# Supplementary material for: Clonality Despite Sex: The Evolution of Host-Associated Sexual Neighborhoods in the Pathogenic Fungus Penicillium marneffei
Source: PLOS journal article supplement (doi:10.1371/journal.ppat.1002851), 2012-10-04
Supplement: S1 (10.1371/journal.ppat.1002851.s001) [file journal.ppat.1002851.s001]

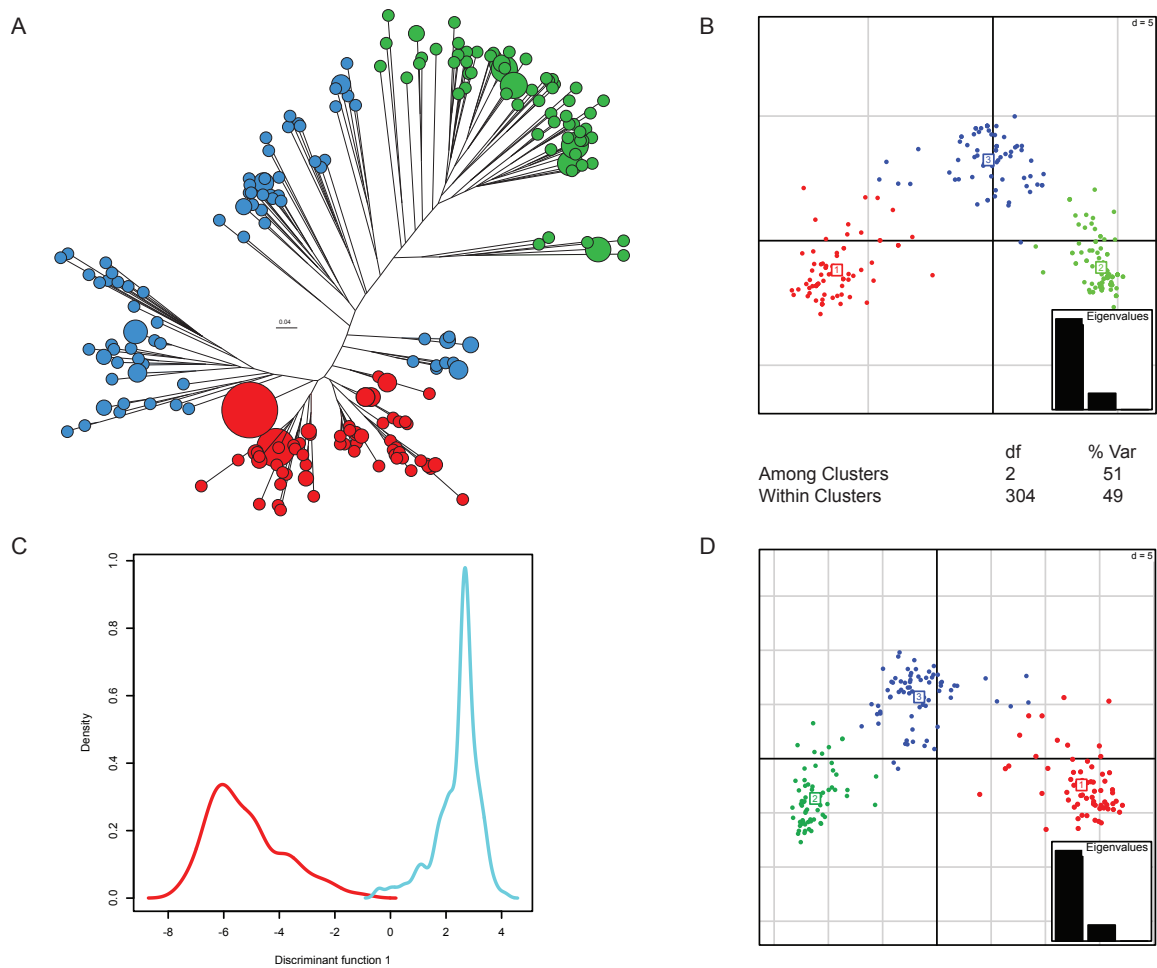

**Figure S1 | DAPC cluster analysis.** A) Unrooted neighbor-joining tree colored by DAPC cluster. B) DAPC clusters including only human isolates recover the same major groups, and AMOVA of these groups shows a very large portion of the variance is attributable to among cluster differences. C) DAPC analysis at only 2 clusters shows distinct but humped and stretched genetic clusters along the single axis. D) Clone-corrected DAPC analysis recovers the same clusters as uncorrected analysis suggesting that the frequency of the clones had little effect on the assignment of individual genotypes to clusters.
