# Supplementary material for: Clonality Despite Sex: The Evolution of Host-Associated Sexual Neighborhoods in the Pathogenic Fungus Penicillium marneffei
Source: PLOS journal article supplement (doi:10.1371/journal.ppat.1002851), 2012-10-04
Supplement: S9 (10.1371/journal.ppat.1002851.s009) [file journal.ppat.1002851.s009]

**Text S2 | In vitro and in vivo co-inoculation:** Five co-housed outbred CD-1 male mice (16 – 18g) were inoculated intranasally with  $10^7$  spores suspended in 40 $\mu$ l of PBS. Conidia from two isolates, PM9, a MAT 1-2 isolate from Thailand, and the type strain ATCC18824 (FR2161) were mixed in a 1:1 ratio to form the inoculum. Mice received cyclophosphamide (150 mg/kg, ENDOXANA, Astra Medica) *via* intraperitoneal injection on days -3 and -1 prior to infection. On day -1, a single dose of hydrocortisone acetate (112.5 mg/kg, HYDROCORTISTAB, Sovereign Medical) was administered subcutaneously. Mice were given free access to food and water, and received continuous oral dosages of prophylactic Baytril 2.5% (Bayer) *via* water. Spore viability was confirmed *via* serial plating of the inoculating dose on Sabouraud agar composed of: 40g/l dextrose, 10g/l peptone and 20g/l agar. Mice were culled 15 days post infection, and lungs and livers were collected for detection, quantification and identification of fungal infection. 10  $\mu$ l of a 1:1 mix of the strains at a concentration of  $10^4$  was used to inoculate 2ml of YPG broth (5g/l yeast extract, 5g/l peptone and 20g/l glucose) and grown for 2 days. Lung and liver sections were weighed and homogenized (homogenizer X120, Bennett Scientific Limited) in saline for colony counting. *In vitro* cultures were transferred to 40 ml of PBS and similarly subjected to homogenization. All murine work was carried out in a Biosafety level 3 secure animal facility under licensed approval from the British Home Office. Serial dilutions of homogenized saline samples were plated (no later than 6 hours after they were removed from the mice or cultures) on Sabouraud agar. Colonies were counted after 4 days in 27°C. Individual colonies were picked out with a probe and transferred to YPG broth and grown for 7 days at 27°C before being used for DNA extraction and subsequent genotyping as before. Isolate genotypes were compared to the initial genotypes of the inoculum and genotypes differing from inoculum were confirmed *via* DNA sequencing.
